# Supplementary material
Source: PubMed Central journal article supplement (PMC3281555)
Supplement: NIHMS342616-supplement-1.pdf [file NIHMS342616-supplement-1.pdf]

## **Supplemental Material**

Appendix 1: CPT codes

| OPEN:                                                                                      |                                                                                                                                                   |
|--------------------------------------------------------------------------------------------|---------------------------------------------------------------------------------------------------------------------------------------------------|
| Inflow:                                                                                    | Outflow:                                                                                                                                          |
| 35521 Bypass graft, with vein;axillary-femoral                                             | 35302 Thromboendarterectomy, including patch graft, if performed;superficial femoral artery                                                       |
| 35351 Thromboendarterectomy, including patch graft, if performed;iliac                     | 35303 Thromboendarterectomy, including patch graft, if performed;popliteal artery                                                                 |
| 35355 Thromboendarterectomy, including patch graft, if performed;iliofemoral               | 35304 Thromboendarterectomy, including patch graft, if performed;tibioperoneal trunk artery                                                       |
| 35361 Thromboendarterectomy, including patch graft, if performed;combined aortoiliac       | 35305 Thromboendarterectomy, including patch graft, if performed;tibial or peroneal artery                                                        |
| 35363 Thromboendarterectomy, including patch graft, if performed;combined aortoiliofemoral | 35306 Thromboendarterectomy, including patch graft, if performed;each additional tibial                                                           |
| 35537: aortoiliac bypass                                                                   | 35371 Thromboendarterectomy, including patch graft, if performed;common femoral                                                                   |
| 35538 Bypass graft, with vein;aortobi-iliac                                                | 35372 Thromboendarterectomy, including patch graft, if performed;deep (profunda) femoral                                                          |
| 35539 Bypass graft, with vein;aortofemoral                                                 | 35533 Bypass graft, with vein;axillary-femoral-femoral                                                                                            |
| 35540 Bypass graft, with vein;aortobifemoral                                               | 35556 Bypass graft, with vein;femoral-popliteal                                                                                                   |
| 35541 Bypass graft, with vein                                                              | 35558 Bypass graft, with vein;femoral-femoral                                                                                                     |
| 35546 Aortofemoral bypass with vein.                                                       | 35566 Bypass graft, with vein;femoral-anterior tibial, posterior tibial, peroneal artery                                                          |
| 35539: Aortofemoral graft with vein.For aortofemoral graft with vein                       | 35571 Bypass graft, with vein;popliteal-tibial, -peroneal artery or other distal vessels                                                          |
| 35548 Bypass graft, with vein;aortoiliofemoral, unilateral                                 | 35583 In-situ vein bypass; femoral-popliteal                                                                                                      |
| 35549 Bypass graft, with vein;aortoiliofemoral, bilateral                                  | 35585 In-situ vein bypass;femoral-anterior tibial, posterior tibial, or peroneal artery                                                           |
| 35551 Bypass graft, with vein;aortofemoral-popliteal                                       | 35587 In-situ vein bypass;popliteal-tibial, peroneal                                                                                              |
| 35563 Bypass graft, with vein;ilioiliac                                                    | 35656 Bypass graft, with other than vein;femoral-popliteal                                                                                        |
| 35565 Bypass graft, with vein;iliofemoral                                                  | 35666 Bypass graft, with other than vein;femoral-anterior tibial, posterior tibial, or peroneal artery                                            |
| 35621 Bypass graft, with other than vein;axillary-femoral                                  | 35671 Bypass graft, with other than vein;popliteal-tibial or -peroneal artery                                                                     |
| 35623 Bypass graft, with other than vein;axillary-popliteal or -tibial                     | 35681 Bypass graft; composite, prosthetic and vein                                                                                                |
| 35637 Bypass graft, with other than vein;aortoiliac                                        | 35682 Bypass graft;autogenous composite, two segments of veins from two locations                                                                 |
| 35638 Bypass graft, with other than vein;aortobi-iliac                                     | 35683 Bypass graft;autogenous composite, three or more segments of vein                                                                           |
| 35646 Bypass graft, with other than vein;aortobifemoral                                    | 35879 Revision, lower extremity arterial bypass, without thrombectomy, open; with vein patch angioplasty                                          |
| 35647 Bypass graft, with other than vein;aortofemoral                                      | 35881 Revision, lower extremity arterial bypass, without thrombectomy, open;with segmental vein interposition                                     |
| 35651 Bypass graft, with other than vein;aortofemoral-popliteal                            | 35883 Revision, femoral anastomosis of synthetic arterial bypass graft in groin, open; with nonautogenous patch graft                             |
| 35654 Bypass graft, with other than vein;axillary-femoral-femoral                          | 35884 Revision, femoral anastomosis of synthetic arterial bypass graft in groin, open;with autogenous vein patch graft                            |
| 35661 Bypass graft, with other than vein;femoral-femoral                                   |                                                                                                                                                   |
| 35663 Bypass graft, with other than vein;ilioiliac                                         |                                                                                                                                                   |
| 35665 Bypass graft, with other than vein;iliofemoral                                       |                                                                                                                                                   |
| ENDO:                                                                                      |                                                                                                                                                   |
| Inflow:                                                                                    | Outflow:                                                                                                                                          |
| 35452 Transluminal balloon angioplasty, open;aortic                                        | 35456 Transluminal balloon angioplasty, open;femoral-popliteal                                                                                    |
| 35454 Transluminal balloon angioplasty, open;iliac                                         | 35459 Transluminal balloon angioplasty, open;tibioperoneal trunk and branches                                                                     |
| 35472 Transluminal balloon angioplasty, percutaneous;aortic                                | 35470 Transluminal balloon angioplasty, percutaneous; tibioperoneal trunk or branches, each vessel                                                |
| 35473 Transluminal balloon angioplasty, percutaneous;iliac                                 | 35474 Transluminal balloon angioplasty, percutaneous;femoral-popliteal                                                                            |
| 35481 Transluminal peripheral atherectomy, open;aortic                                     | 35483 Transluminal peripheral atherectomy, open;femoral-popliteal                                                                                 |
| 35482 Transluminal peripheral atherectomy, open;iliac                                      | 35485 Transluminal peripheral atherectomy, open;tibioperoneal trunk and branches                                                                  |
| 35491 Transluminal peripheral atherectomy, percutaneous;aortic                             | 35493 Transluminal peripheral atherectomy, percutaneous;femoral-popliteal                                                                         |
| 35492 Transluminal peripheral atherectomy, percutaneous;iliac                              | 35495 Transluminal peripheral atherectomy, percutaneous;tibioperoneal trunk and branches                                                          |
|                                                                                            | 37205 Transcatheter placement of an intravascular stent(s), (except coronary, carotid, and vertebral vessel), percutaneous; initial vessel        |
|                                                                                            | 37206 Transcatheter placement of an intravascular stent(s), (except coronary, carotid, and vertebral vessel), percutaneous;each additional vessel |
|                                                                                            | 37207 Transcatheter placement of an intravascular stent(s), (non-coronary vessel), open; initial vessel                                           |
|                                                                                            | 37208 Transcatheter placement of an intravascular stent(s), (non-coronary vessel), open;each additional vessel                                    |
| Diagnostic Only Endovascular Procedures:                                                   |                                                                                                                                                   |
| 36200                                                                                      | Introduction of catheter, aorta                                                                                                                   |
| 36245                                                                                      | selective catheter placement, arterial system, each first-order, lower- extremity                                                                 |
| 36246                                                                                      | selective catheter placement, arterial system, second-order, lower- extremity                                                                     |
| 36247                                                                                      | selective catheter placement, arterial system, third-order, lower- extremity                                                                      |
| 36248                                                                                      | selective catheter placement, arterial system, beyond third order, lower- extremity                                                               |
| CPT Code                                                                                   | Outcome Measure: Amputation                                                                                                                       |
| 27590                                                                                      | Amputation, thigh, through femur, any level;                                                                                                      |
| 27591                                                                                      | Amputation, thigh, through femur, any level; immediate fitting technique including first cast                                                     |
| 27592                                                                                      | Amputation, thigh, through femur, any level; open, circular (guillotine)                                                                          |
| 27880                                                                                      | Amputation, leg, through tibia and fibula;                                                                                                        |
| 27881                                                                                      | Amputation, leg, through tibia and fibula; with immediate fitting technique                                                                       |
| 27882                                                                                      | Amputation, leg, through tibia and fibula; open, circular (guillotine)                                                                            |
| 28805                                                                                      | Amputation, foot; transmetatarsal                                                                                                                 |

Appendix 2:

Multivariable analysis of factors associated with undergoing a non-diagnostic endovascular procedure in the year prior to amputation.

|                                   | Odds Ratio | 95% Confidence Interval | p value |
|-----------------------------------|------------|-------------------------|---------|
| <b>Intensity of Vascular Care</b> |            |                         |         |
| Very Low Intensity                | Referent   | "--"                    | "--"    |
| Low Intensity                     | 1.1        | 1.0                     | 1.3     |
| Medium Intensity                  | 1.4        | 1.2                     | 1.6     |
| High Intensity                    | 1.6        | 1.3                     | 1.8     |
| Very High Intensity               | 2.0        | 1.7                     | 2.2     |
| <b>Age</b>                        |            |                         |         |
| Age 65-70                         | Referent   | "--"                    | "--"    |
| Age 76-80                         | 1.1        | 0.9                     | 1.2     |
| Age 81-85                         | 1.0        | 0.9                     | 1.2     |
| Age 86-90                         | 0.8        | 0.7                     | 1.0     |
| Age 91-95                         | 0.8        | 0.7                     | 0.9     |
| Age >95                           | 0.4        | 0.4                     | 0.6     |
| Black Race                        | 0.7        | 0.7                     | 0.8     |
| Male Gender                       | 1.0        | 0.9                     | 1.0     |
| Myocardial Infarction             | 1.1        | 0.9                     | 1.2     |
| Congestive Heart Failure          | 1.1        | 1.0                     | 1.2     |
| COPD                              | 1.2        | 1.1                     | 1.3     |
| Diabetes                          | 1.2        | 1.1                     | 1.4     |
| Renal Failure                     | 1.7        | 1.5                     | 1.8     |

Multivariable analysis of factors associated with undergoing an open surgical procedure in the year prior to amputation.

|                                   | Odds Ratio | 95% Confidence Interval | p value |
|-----------------------------------|------------|-------------------------|---------|
| <b>Intensity of Vascular Care</b> |            |                         |         |
| Very Low Intensity                | Referent   | "--"                    | "--"    |
| Low Intensity                     | 1.7        | 1.5                     | 2.0     |
| Medium Intensity                  | 1.9        | 1.6                     | 2.2     |
| High Intensity                    | 2.1        | 1.8                     | 2.5     |
| Very High Intensity               | 2.5        | 2.2                     | 2.9     |
| <b>Age</b>                        |            |                         |         |
| Age 65-70                         | Referent   | "--"                    | "--"    |
| Age 76-80                         | 0.9        | 0.8                     | 1.1     |
| Age 81-85                         | 0.9        | 0.8                     | 1.0     |
| Age 86-90                         | 0.7        | 0.6                     | 0.8     |
| Age 91-95                         | 0.5        | 0.4                     | 0.6     |
| Age >95                           | 0.3        | 0.2                     | 0.4     |
| Congestive Heart Failure          | 0.9        | 0.8                     | 1.0     |
| Renal Failure                     | 0.9        | 0.8                     | 1.0     |
| Black Race                        | 0.9        | 0.8                     | 1.0     |
| Male Gender                       | 1.0        | 0.9                     | 1.1     |
| COPD                              | 1.5        | 1.4                     | 1.7     |
| Diabetes                          | 1.2        | 1.1                     | 1.4     |
| Myocardial Infarction             | 1.4        | 1.2                     | 1.6     |
